# Supplementary material for: Biocompatible, Purified VEGF-A mRNA Improves Cardiac Function after Intracardiac Injection 1 Week Post-myocardial Infarction in Swine
Source: PubMed Central journal article supplement — Mol Ther Methods Clin Dev. 2018 Apr 10;9:330–46. doi: 10.1016/j.omtm.2018.04.003 (PMC6054703; doi:10.1016/j.omtm.2018.04.003), 2018-04-10
Supplement: mmc1.pdf [file mmc1.pdf]

## Supplemental Information

### **Biocompatible, Purified *VEGF-A* mRNA Improves**

### **Cardiac Function after Intracardiac Injection**

### **1 Week Post-myocardial Infarction in Swine**

**Leif Carlsson, Jonathan C. Clarke, Christopher Yen, Francine Gregoire, Tamsin Albery, Martin Billger, Ann-Charlotte Egnell, Li-Ming Gan, Karin Jennbacken, Edvin Johansson, Gunilla Linhardt, Sofia Martinsson, Muhammad Waqas Sadiq, Nevin Witman, Qing-Dong Wang, Chien-Hsi Chen, Yu-Ping Wang, Susan Lin, Barry Ticho, Patrick C.H. Hsieh, Kenneth R. Chien, and Regina Fritsche-Danielson**

Supplemental Materials

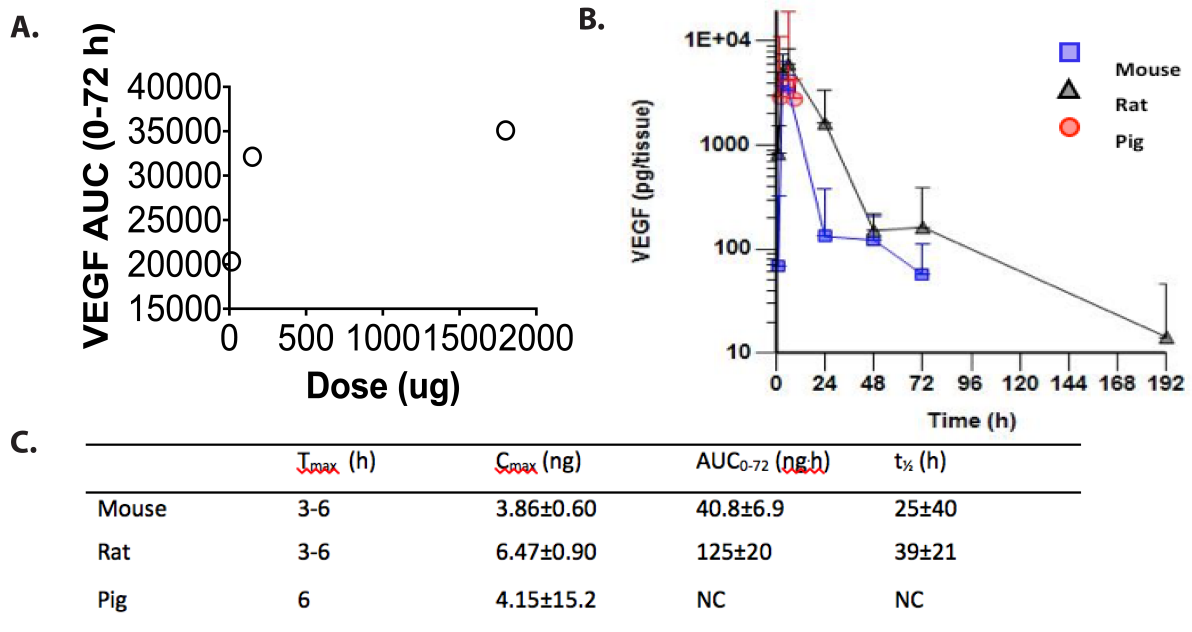

**Figure S1. Pharmacokinetics of VEGF protein from purified cs-VEGF mRNA.** (A) Increasing doses of cs-VEGF mRNA were injected into a normal, non-ischemic rat heart and tissue levels were tested. With a ten-fold increase in dose, there was only a 1.6 fold increase in the area under the curve. (n=3 per time point and dose) (B) Pharmacokinetic profiles of VEGF protein in cardiac tissue in mouse, rat, and pig following single intra-cardiac injections of cs-VEGF mRNA (100 ug). (C) Pharmacokinetic parameters of VEGF protein in mice, rat, and pigs following single intra-cardiac injections of cs-VEGF mRNA (100ug). All data are mean +/- SD. Mouse and rat n=3, pig n=2.

**Table S1. Plasma concentrations of IL-6 and IL-8 following intradermal and intravenous administration of VEGF mRNA in the Cynomolgus monkey**

| Dose (mg/kg) | Administration route | Analyte | Plasma concentration (pg/mL) |             |             |             |
|--------------|----------------------|---------|------------------------------|-------------|-------------|-------------|
|              |                      |         | Week -2                      | Week -1     | Day 1 6 h   | Day 1 24 h  |
| 0            | ID                   | IL-6    | BLQ                          | BLQ         | BLQ         | BLQ         |
|              |                      | IL-8    | 15.6 (11.8)                  | 12.6 (6.0)  | 18.1 (16.7) | 21.5 (5.6)  |
| 0.5          | ID                   | IL-6    | BLQ                          | BLQ         | BLQ         | BLQ         |
|              |                      | IL-8    | 49.8 (48.1)                  | 55.2 (66.7) | 102 (89.2)  | 33.2 (35.3) |
| 1            | ID                   | IL-6    | BLQ                          | BLQ         | BLQ         | BLQ         |
|              |                      | IL-8    | 27.4 (34.9)                  | 21.5 (15.2) | 40.9 (22.7) | 41.7 (14.8) |
| 3            | ID                   | IL-6    | BLQ                          | BLQ         | BLQ         | BLQ         |
|              |                      | IL-8    | 30.0 (18.6)                  | 40.9 (29.9) | 45.3 (27.2) | 34.0 (16.4) |
| 3            | IV                   | IL-6    | BLQ                          | BLQ         | BLQ         | BLQ         |
|              |                      | IL-8    | 28.8 (11.3)                  | 36.5 (37.2) | 58.8 (28.1) | 45.9 (39.0) |

ID, intradermal, IV; intravenous, BLQ; below limit of quantification, NC; not calculated, NS; no sampling. Lower limits of quantification were 8.40 pg/mL (IL-6) and 2.88 pg/mL (IL-8), respectively. Results shown are means (SD), n=4 males/group.

**Table S2. Plasma concentrations of IL-6 and KC following intradermal and intravenous administration of VEGF mRNA in the rat**

| Dose (mg/kg) | Administration route | Analyte | Plasma concentration (pg/mL) |           |            |
|--------------|----------------------|---------|------------------------------|-----------|------------|
|              |                      |         | Day 1 3 h                    | Day 1 6 h | Day 1 24 h |
| 0            | ID                   | IL-6    | NS                           | BLQ       | BLQ        |
|              |                      | KC      | NS                           | BLQ       | BLQ        |
| 0.5          | ID                   | IL-6    | NS                           | BLQ       | BLQ        |
|              |                      | KC      | NS                           | BLQ       | BLQ        |
| 1            | ID                   | IL-6    | NS                           | BLQ       | BLQ        |
|              |                      | KC      | NS                           | BLQ       | BLQ        |
| 3            | ID                   | IL-6    | NS                           | BLQ       | BLQ        |
|              |                      | KC      | NS                           | BLQ       | BLQ        |
| 3            | IV                   | IL-6    | BLQ                          | NS        | BLQ        |
|              |                      | KC      | 106 (40.0)                   | NS        | BLQ        |

ID, intradermal, IV; intravenous, BLQ; below limit of quantification, NC; not calculated, NS; no sampling. Lower limits of quantification were 4.37 pg/mL (IL-6) and 10.4 pg/mL (KC), respectively. Results shown are means (SD), n=10 males/group.

**Table S3. Overview of cardiac therapy for preventing/repairing left ventricular dysfunction and timing of VEGF mRNA delivery after a myocardial infarction**

| <b>Acute</b>      | <b>Sub acute</b> | <b>Chronic</b>        |
|-------------------|------------------|-----------------------|
| Anti-coagulation  | Beta-blockers    | +/- Beta-blockers     |
| Anti-platelet     | ACEI/ARB         | +/-ACEI/ARB           |
| Revascularization | VEGF mRNA        |                       |
| Statins           |                  |                       |
| Beta-blockers     |                  |                       |
| ACEI/ARB          |                  |                       |
| VEGF mRNA         |                  |                       |
|                   |                  |                       |
| If EF<40%:        | If EF <40%:      | IF EF <40%:           |
| MRA               | ARNI             | +/- Revascularization |
|                   | Vasodilators*    | Beta-blockers         |
|                   | MRA              | ACEI/ARB              |
|                   |                  | ARNI                  |
|                   |                  | Vasodilators*         |
|                   |                  | Resynchronization     |
|                   |                  | MRA                   |

ACEI; Angiotensin Converting Enzyme Inhibitors, ARB; Angiotensin Receptor Blocker, MRA; Mineralocorticoid Receptor Antagonists, ARNI; Angiotensin Receptor Blocker-Nepriylsin Inhibitor. EF; Ejection Fraction. \*Vasodilatory therapy for African-Americans.

**Table S4. Complete codon optimized sequence of VEGF mRNA transcript used for production**

| Name                 | Sequence                                                                                                                                                                                                                                                                                                                                                                                                                                                                                                                                                                                                                                                                                                                                                                                                                                                                                                                                                                                                                                                                                                                                                                                                                           |
|----------------------|------------------------------------------------------------------------------------------------------------------------------------------------------------------------------------------------------------------------------------------------------------------------------------------------------------------------------------------------------------------------------------------------------------------------------------------------------------------------------------------------------------------------------------------------------------------------------------------------------------------------------------------------------------------------------------------------------------------------------------------------------------------------------------------------------------------------------------------------------------------------------------------------------------------------------------------------------------------------------------------------------------------------------------------------------------------------------------------------------------------------------------------------------------------------------------------------------------------------------------|
| VEGF mRNA Transcript | <p>N7mGpppGmGGAAAUAAGAGAGAAAAGAAGAGUAAGAAGAAAUAUAAGAGCCACCAUGAACUUU<br/>           CUGCUGUCUUGGGUGCAUUGGAGCCUUGCCUUGCUGCUCUACCUCACCAUGCCAAGUGGUCCCA<br/>           GGCUGCACCCAUGGCAGAAGGAGGAGGGCAGAAUCAUCACGAAGUGGUGAAGUUCAUGGAUGUCU<br/>           AUCAGCGCAGCUACUGCCAUCCAUCGAGACCCUGGUGGACAUCUUCAGGAGUACCCUGAUGAG<br/>           AUCGAGUACAUCUUCAAGCCAUCCUGUGUGCCCCUGAUGCGAUGCGGGGGCUGCUGCAAUGACGA<br/>           GGGCCUGGAGUGUGUGCCCACUGAGGAGUCCAACAUCACCAUGCAGAUUAUGCGGAUCAAACCUC<br/>           ACCAAGGCCAGCACAUAGGAGAGAUGAGCUUCCUACAGCACAACAAAUGUGAAUUCAGACCAAAG<br/>           AAAGAUAGAGCAAGACAAGAAAAUCCUGUGGGCCUUGCUCAGAGCGGAGAAAGCAUUUGUUUG<br/>           UACAAGAUCGCGCAGACGUGUAAAUGUCCUGCAAAAAACACAGACUCGCGUUGCAAGGCGAGGCAG<br/>           CUUGAGUUAAAACGAACGUACUUGCAGAUGUGACAAGCCGAGGCGGUGAAUAAUAGGCUGGAGCCUC<br/>           GGUGGCCAUGCUUCUUGCCCCUUGGGCCUCCCCCAGCCCCUCCUCCCUUCCUGCACCCGUACCCC<br/>           CGUGGUCUUUGAAUAAAGUCUGAGUGGGCGGCAAAAAAAAAAAAAAAAAAAAAAAAAAAAAAAAAAA<br/>           AAAAAAAAAAAAAAAAAAAAAAAAAAAAAAAAAAAAAAAAAAAAAAAAAAAAAAAAAAAAAAAAAAAAA<br/>           AAAAAUCUAGGCUGGAGCCUCGGUGGCCAUGCUUCUUGCCCUUGGGCCUCCCCCAGCCCCUCCU<br/>           CCCCUCUGCACCCGUACCCCCGUGGUCUUUGAAUAAAGUCUGA</p> |
| Open Reading Frame   | <p>ATGAACTTTCTGCTGCTTTGGGTGCATTGGAGCCTTGCCTTGCTGCTCTACCTCCACCATGCCAAGT<br/>           GGTCCAGGCTGCACCCATGGCAGAAGGAGGAGGGCAGAATCATCACGAAGTGGTGAAGTTCATGG<br/>           ATGTCTATCAGCGCAGCTACTGCCATCCAATCGAGACCCCTGGTGGACATCTTCCAGGAGTACCCTG<br/>           ATGAGATCGAGTACATCTTCAAGCCATCCTGTGTGCCCTGATGCGATGCGGGGGCTGCTGCAATG<br/>           ACGAGGGCCTGGAGTGTGTGCCACTGAGGAGTCCAACATCACCATGCAGATTATGCGGATCAAAC<br/>           CTCACCAAGGCCAGCACATAGGAGAGATGAGCTTCTACAGCACAACAAATGTGAATGCAGACCAA<br/>           AGAAAGATAGAGCAAGACAAGAAAATCCCTGTGGGCCTTGCTCAGAGCGGAGAAAGCATTGTGTTT<br/>           GTACAAGATCCGCAGACGTGTAATGTTCTGCAAAAACACAGACTCGCGTTGCAAGGCGAGGCAG<br/>           CTTGAGTTAAACGAACGTACTTGCAGATGTGACAAGCCGAGGCGG</p>                                                                                                                                                                                                                                                                                                                                                                                                                                                                                                   |

**Supplemental methods**

**Assessment of activation of the innate immune system in the Cynomolgus monkey and the rat**

These studies were performed in accordance with the OECD principles of Good Laboratory Practice and in compliance with legislation (Animals (Scientific Procedures) Act 1986 and European Directive 2010/63/EU on the protection of animals used for scientific purposes).

Three groups of Cynomolgus monkeys, each consisting of 4 males, were given VEGF mRNA intradermally, once on Day 1. The dose levels were 0.5, 1.0 or 3.0 mg/animal. An additional group of 4 males were given VEGF mRNA intravenously, once on Day 1 at a dose level of 3.0 mg/animal. A further group of 4 males were dosed with the citrate/saline vehicle (10 mmol/L sodium citrate, 130 mmol/L sodium chloride, pH 6.5) once intradermally on Day 1. Blood samples (using K<sub>2</sub>EDTA as anticoagulant) for plasma analysis of IL-6 and IL-8 were taken from the femoral vein

at the following time points: twice pre study (week 2 and week 1) then 3 hours (intravenous dosing group only), 6 hours and 24 hours after dosing on day 1, respectively. The plasma concentrations of IL-6 and IL-8 were determined by a qualified method using Luminex technology. Calibration standards were prepared in Universal Assay Buffer and calibration standards were freshly prepared for each batch of samples. Analyses were performed in batches containing study samples, calibration standards at 7 concentration levels and blank samples. Lower limits of quantification for IL-6 and IL-8 were 8.40 and 2.88 pg/mL, respectively.

Three groups of Han Wistar rats, each consisting of 10 males, were given VEGF mRNA intradermally, once on Day 1. The dose levels were 0.5, 1.0 or 3.0 mg/animal. An additional group of 10 males were given VEGF mRNA intravenously, once on Day 1 at a dose level of 3.0 mg/animal. A further group of 10 males were dosed with the citrate/saline vehicle, as above. Blood samples (using K2EDTA as anticoagulant) for plasma analysis of IL-6 and keratinocyte-derived chemokine (KC, rodent functional counterpart to human IL-8) were taken from the lateral tail vein at the following time points: 3 hours (iv group), 6 hours (intradermal and vehicle groups) and 24 hours (all groups) after dosing. The plasma concentrations of IL-6 and KC were determined as described above. Lower limits of quantification for IL-6 and KC were 4.37 and 10.4 pg/mL, respectively.
